# Supplementary material for: Organocatalytic enantioselective synthesis of dihydronaphthofurans and dihydrobenzofurans: reaction development and insights into stereoselectivity
Source: Royal Society of Chemistry journal article supplement (doi:10.1039/d2ob01571d), 2022-01-01
Supplement: d2ob01571d2.pdf [file d2ob01571d2.pdf]

## Movie-Supporting Information-trans-TS1

### Imaginary frequency

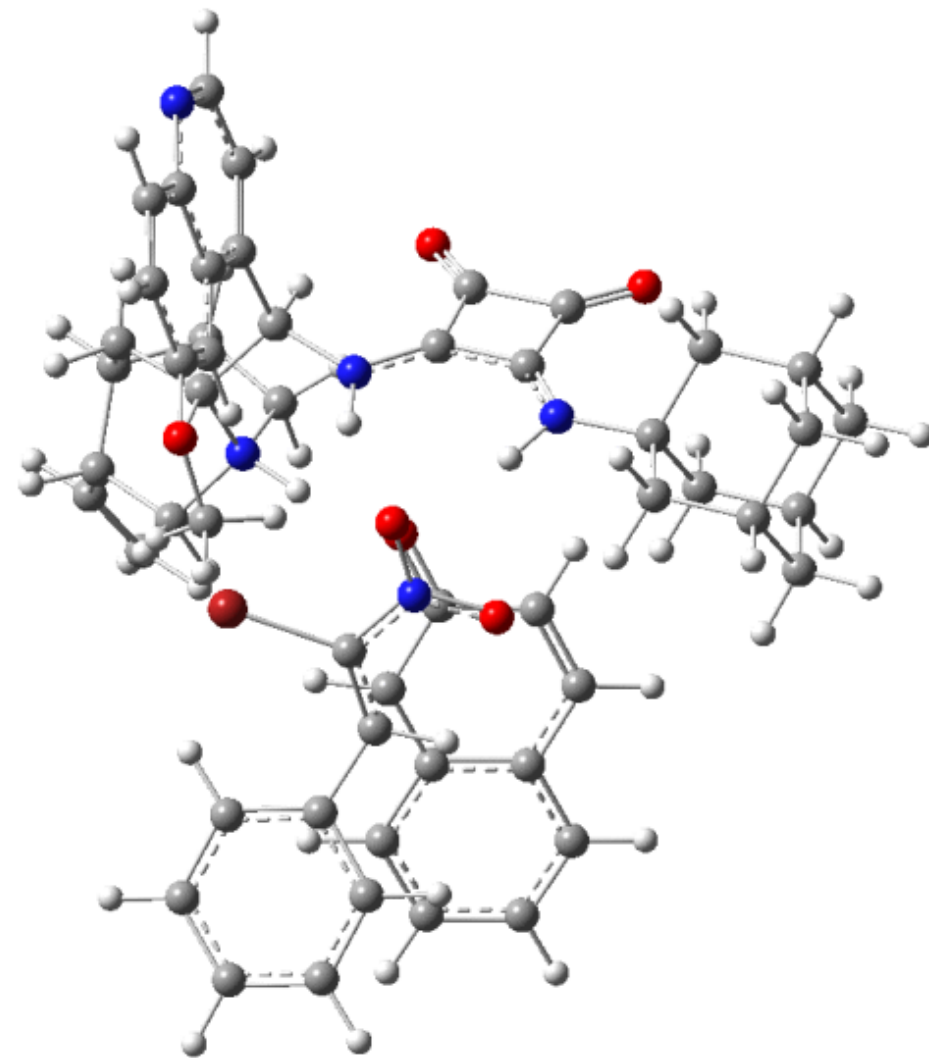

|          | Mode #   | Frequency      | Infrared        |
|----------|----------|----------------|-----------------|
| <b>1</b> | <b>1</b> | <b>-305.10</b> | <b>381.0632</b> |
| 2        | 2        | 11.62          | 0.5038          |
| 3        | 3        | 20.66          | 0.2850          |
| 4        | 4        | 20.81          | 0.4351          |
| 5        | 5        | 23.00          | 0.1279          |
| 6        | 6        | 27.80          | 0.0860          |
| 7        | 7        | 33.11          | 2.3383          |
| 8        | 8        | 38.86          | 1.2678          |
| 9        | 9        | 40.49          | 1.4179          |
| 10       | 10       | 45.87          | 0.5685          |

# Movie-Supporting Information-trans-TS2

## Imaginary frequency

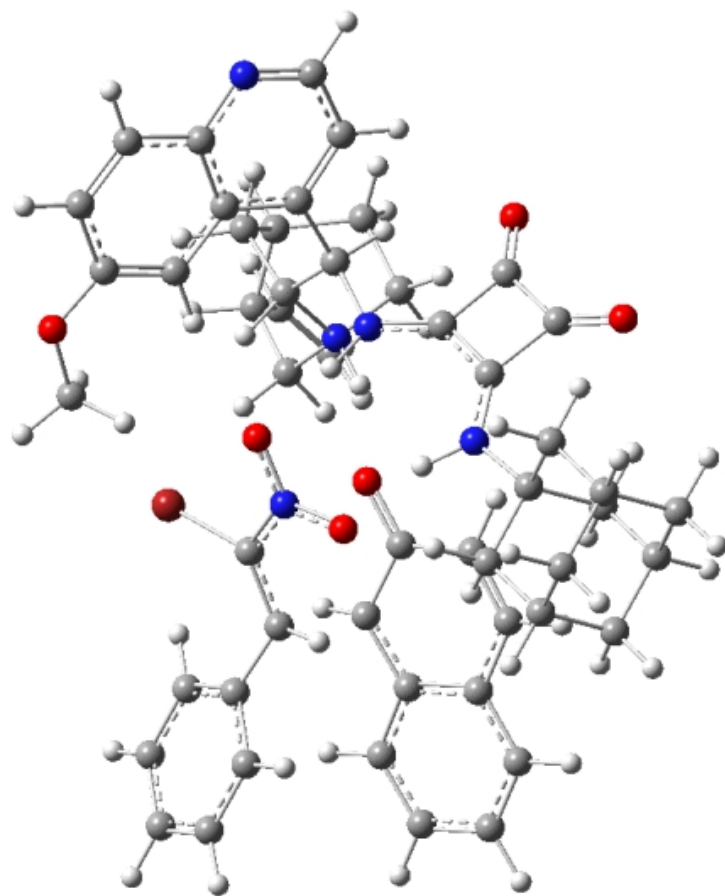

|          | Mode #   | Frequency      | Infrared        |
|----------|----------|----------------|-----------------|
| <b>1</b> | <b>1</b> | <b>-172.22</b> | <b>295.8616</b> |
| 2        | 2        | 13.05          | 0.6647          |
| 3        | 3        | 17.44          | 0.0229          |
| 4        | 4        | 18.27          | 0.2221          |
| 5        | 5        | 25.01          | 0.3408          |
| 6        | 6        | 26.31          | 0.8585          |
| 7        | 7        | 31.98          | 0.0762          |
| 8        | 8        | 34.30          | 1.5796          |
| 9        | 9        | 38.16          | 4.3626          |
| 10       | 10       | 41.04          | 0.3796          |

# Movie-Supporting Information-cis-TS

## Imaginary frequency

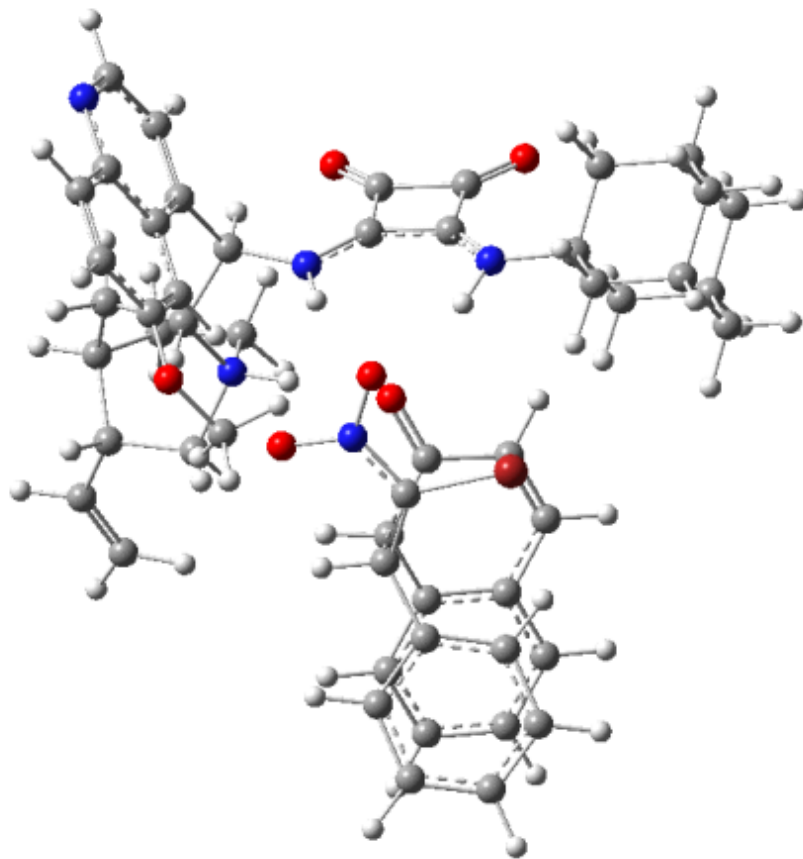

|    | Mode # | Frequency | Infrared |
|----|--------|-----------|----------|
| 1  | 1      | -292.83   | 419.2991 |
| 2  | 2      | 11.79     | 0.0971   |
| 3  | 3      | 16.47     | 0.3150   |
| 4  | 4      | 22.65     | 0.2138   |
| 5  | 5      | 27.71     | 0.0375   |
| 6  | 6      | 28.54     | 1.5380   |
| 7  | 7      | 30.44     | 0.1492   |
| 8  | 8      | 35.24     | 0.6126   |
| 9  | 9      | 38.13     | 1.7542   |
| 10 | 10     | 46.71     | 0.9755   |
