# Supplementary material for: Organocatalytic enantioselective synthesis of dihydronaphthofurans and dihydrobenzofurans: reaction development and insights into stereoselectivity
Source: Royal Society of Chemistry journal article supplement (doi:10.1039/d2ob01571d), 2022-01-01

TS1-single imaginary frequency

| <u>Mode</u> | <u>Freq.</u>                    |
|-------------|---------------------------------|
| 1           | $\nu = -305.11 \text{ cm}^{-1}$ |

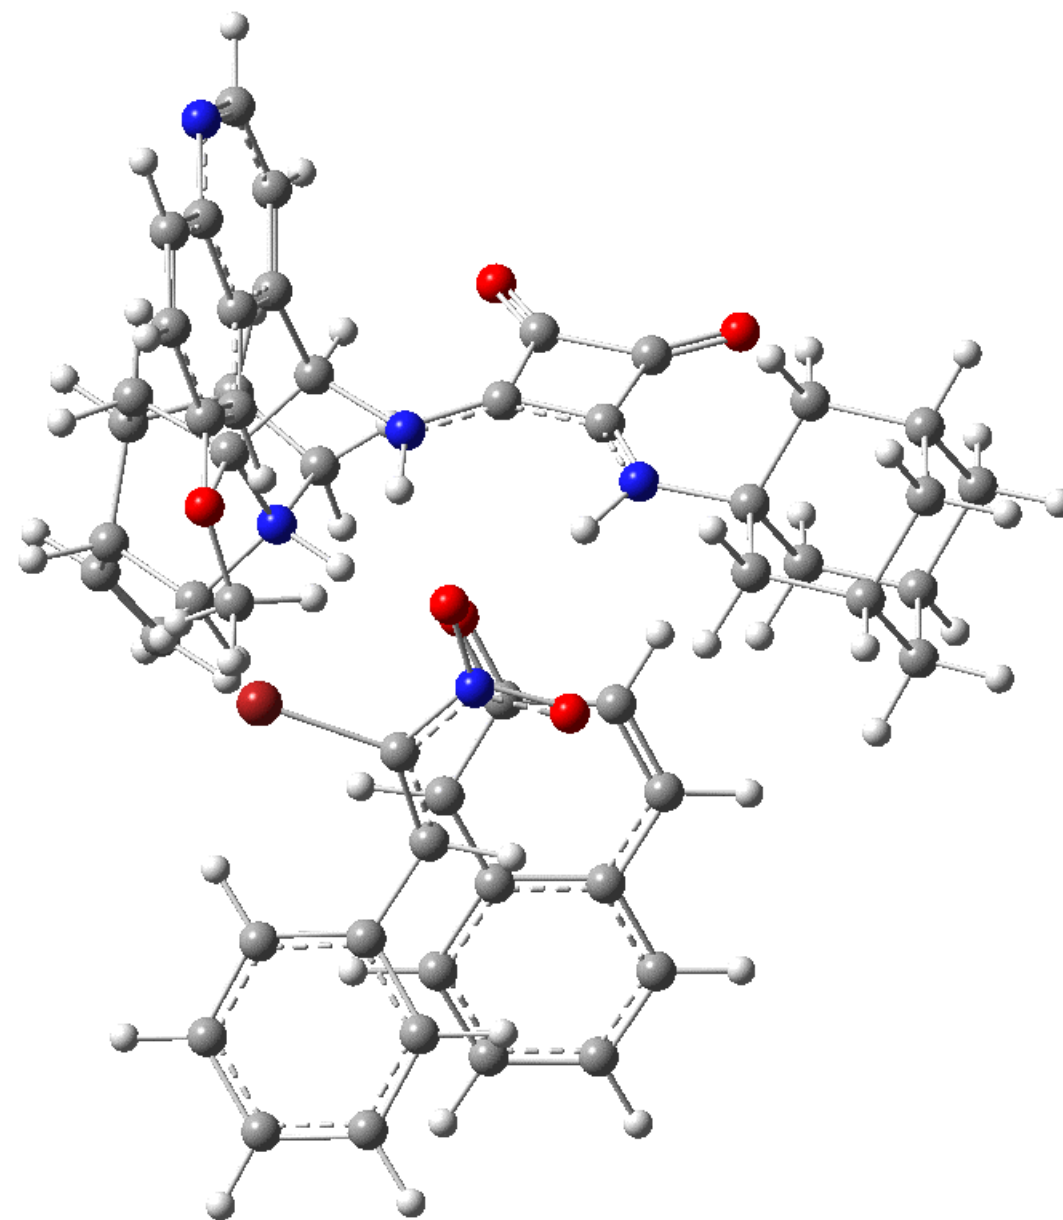

TS2-single imaginary frequency

| <u>Mode</u> | <u>Freq.</u>                    |
|-------------|---------------------------------|
| 1           | $\nu = -172.22 \text{ cm}^{-1}$ |

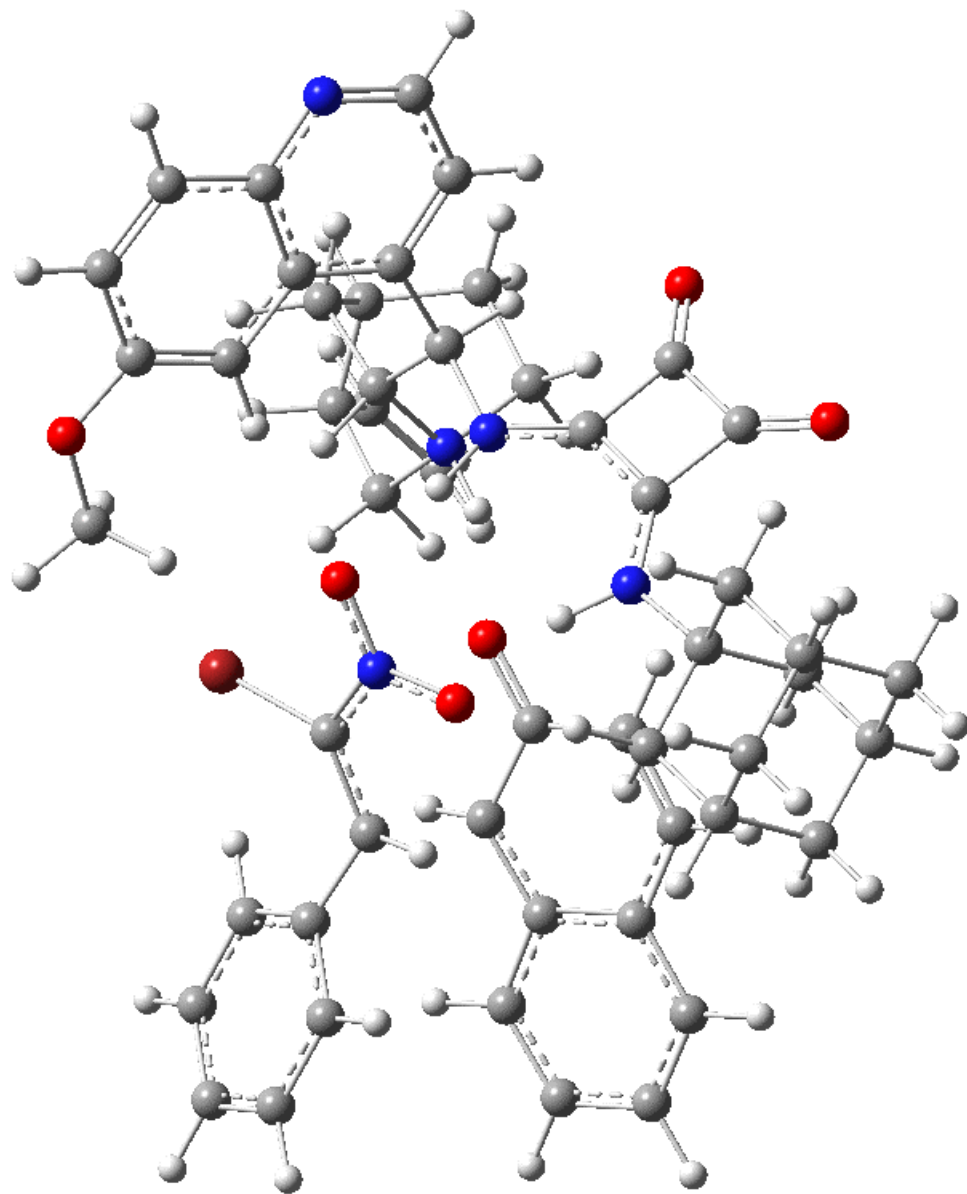

Supplement: d2ob01571d3.pdf [file d2ob01571d3.pdf]
